# Supplementary material for: Exploring molecular variation and combining ability of local and exotic bread wheat genotypes under well-watered and drought conditions
Source: PeerJ. 2025 Feb 27;13:e18994. doi: 10.7717/peerj.18994 (PMC11874937; doi:10.7717/peerj.18994)
Supplement: Supplemental Information 2 [file peerj-13-18994-s002.xlsx]

## Sheet: Data
Irrigation	Genotype	Replication	Days to heading	Plant height (cm)	Spike length (cm)	Number of spikelets/spike	Number of spikes/plant	Number of grains/spike	1000-grain weight (g)	Grain yield/plant (g)
Well-watered	P1	1	94	90	15.1	24.6	13.6	63	50.44	30
Well-watered	P1xP2	1	92	83.6	12.7	24.5	10.75	64	54.32	35
Well-watered	P1xP3	1	94	75	12.2	22	14	57	48.21	24																			Number of spikelets/spike		Number of spikes/plant		Number of grains/spike
Well-watered	P1xP4	1	94	85.4	14.25	23	11	56	48.5	28
Well-watered	P1xP5	1	91	80	13	22	15	63	53.35	38
Well-watered	P1xP6	1	92	81.5	13.38	21.8	10	56	48.5	20
Well-watered	P1xP7	1	94	80	15.13	20	10	53	48.5	22
Well-watered	P1xP8	1	95	78.83	15	23.67	10	62	55.29	25
Well-watered	P2	1	86	80	14	25	9	61	43.65	25.7
Well-watered	P2xP3	1	92	86	13.38	19.5	11.5	50	41.52	28.84
Well-watered	P2xP4	1	91	83.4	14.67	22.25	10.75	58	56.75	35
Well-watered	P2xP5	1	91	88	13	18	12	58	56.26	30
Well-watered	P2xP6	1	95	85	15	22.2	10.2	53	50.44	27.18
Well-watered	P2xP7	1	96	82.71	14.25	23	7.8	60	51.6	21.47
Well-watered	P2xP8	1	94	82	14	21.33	16	56	51.41	28.73
Well-watered	P3	1	96	85.33	12.2	22	15.5	58	44.62	30
Well-watered	P3xP4	1	96	87.67	13.75	22.2	13.71	58	53.35	25.87
Well-watered	P3xP5	1	97	93.67	15.5	21	13	55	47.92	30
Well-watered	P3xP6	1	95	86	13	20.6	15	54	54.32	26
Well-watered	P3xP7	1	94	89.33	14.9	21.2	14.6	56	55.58	35.46
Well-watered	P3xP8	1	93	100	14	22	16.71	69	54.32	38
Well-watered	P4	1	96	93.75	14.4	21.4	12.4	56.18	46.85	32
Well-watered	P4xP5	1	93	90	15.6	23	13	60.38	54.32	34.89
Well-watered	P4xP6	1	91	97.75	14.2	22	18	56	48.5	32
Well-watered	P4xP7	1	91	91.25	15.6	22	14	56	54.42	24.82
Well-watered	P4xP8	1	95	101.2	15	23.33	10	61	54.22	35
Well-watered	P5	1	93	95	13.7	21.25	18	55	56.65	23.52
Well-watered	P5xP6	1	95	98.5	13.5	21.82	12	55	55.78	26.22
Well-watered	P5xP7	1	92	91.8	14.2	21.8	15.5	57.23	45.98	30.44
Well-watered	P5xP8	1	95	92	15.25	21.4	13.6	56	54.32	26.88
Well-watered	P6	1	92	94.6	11.6	22.33	12	58	55	29.7
Well-watered	P6xP7	1	91	106	14	22	13.4	58	54.03	30.22
Well-watered	P6xP8	1	90	104.2	12	20	11	63	56.55	28
Well-watered	P7	1	95	97.6	14	26.5	11.5	62	48.5	26
Well-watered	P7xP8	1	91	94.2	13.64	23	19.5	60	55	30
Well-watered	P8	1	96	93.8	13.75	22.8	15.2	59	55.29	29
Well-watered	P1	2	94	75	15	24.8	15.4	65	48.5	34
Well-watered	P1xP2	2	91	83.67	14.33	24.5	13	60	56.26	32.85
Well-watered	P1xP3	2	91	84	13.5	22.4	13.2	58	50.1	28.35
Well-watered	P1xP4	2	95	75.25	14.13	22	11	58	51.12	30
Well-watered	P1xP5	2	92	85	13.9	21	14.33	61	54.32	39
Well-watered	P1xP6	2	93	79	14.5	20	11	52	40.35	29.56
Well-watered	P1xP7	2	95	75	14.13	18	11.83	50	50.44	20
Well-watered	P1xP8	2	94	88.25	14.75	22.4	9.8	59	56.07	26.73
Well-watered	P2	2	87	82.5	15	24	12	63	44.62	21.92
Well-watered	P2xP3	2	92	85	12.9	20.83	10	48	50.44	22.37
Well-watered	P2xP4	2	92	81.5	15	22.5	12.5	59	50.44	37
Well-watered	P2xP5	2	94	88.6	12	22	13	57	50.73	31
Well-watered	P2xP6	2	91	91.67	14	22.8	12.4	47	60.43	24.33
Well-watered	P2xP7	2	95	84.17	14.5	24.75	11.25	53	51.22	25
Well-watered	P2xP8	2	95	85.5	15.17	22	10	58	50.44	24.57
Well-watered	P3	2	95	85.8	12.9	22.4	17.6	59	41.23	37.91
Well-watered	P3xP4	2	94	99	14.1	22	14.14	54	51.7	32.24
Well-watered	P3xP5	2	94	97.86	14	20	15	53	43.94	35
Well-watered	P3xP6	2	95	90	13.1	21	16.8	55	55.58	34.49
Well-watered	P3xP7	2	87	89.8	13.5	20	12.67	53	43.36	30.4
Well-watered	P3xP8	2	98	95	14.75	21.67	20.5	65	58.2	40
Well-watered	P4	2	98	92.33	13.5	21.71	15.43	57	52.87	34
Well-watered	P4xP5	2	95	85.4	14.5	22	10.33	60	50.93	38
Well-watered	P4xP6	2	95	93.2	14.5	23	16	61	51.7	39.46
Well-watered	P4xP7	2	87	91	14.33	23.33	13	61	56.84	30
Well-watered	P4xP8	2	95	97.4	15.38	23	16.33	60	54.22	37
Well-watered	P5	2	94	98.8	13	20.33	14.67	53	41.9	26.61
Well-watered	P5xP6	2	93	98	15.38	23.6	12	60	46.85	37.68
Well-watered	P5xP7	2	92	100.5	14.5	23.75	16.5	62.34	50.25	27.89
Well-watered	P5xP8	2	93	87	14.38	22.25	15.25	58	40.84	37.63
Well-watered	P6	2	92	97.4	12.4	22.57	14	59	45.69	29.8
Well-watered	P6xP7	2	94	101.4	15	23.83	12.17	63	48.5	30
Well-watered	P6xP8	2	90	99.8	13	21	12	65	58.3	26
Well-watered	P7	2	91	96.8	14	21	11	60	56.26	24
Well-watered	P7xP8	2	93	93.2	14.5	22.5	14	59	52.19	28
Well-watered	P8	2	93	95.8	13.9	21.29	15.71	56	51.41	34
Well-watered	P1	3	96	100	15.6	23.8	12	63	49.86	28
Well-watered	P1xP2	3	91	91.2	14.75	20.6	10.2	57	55.29	20.66
Well-watered	P1xP3	3	90	83.5	13	20	10.4	54	49.5	26.16
Well-watered	P1xP4	3	95	89.8	14	23.5	12.5	60	53.35	32
Well-watered	P1xP5	3	96	90	13	22	14	59	50.44	41
Well-watered	P1xP6	3	97	85.25	12.5	22.2	7.25	56	44.43	17.24
Well-watered	P1xP7	3	95	80	15	19	11.5	50	46.56	24
Well-watered	P1xP8	3	93	79	14.67	22	23	58	58.3	30
Well-watered	P2	3	88	80.33	15.67	22.6	13	59	49.86	22.3
Well-watered	P2xP3	3	94	88	12.88	20	12.5	53	48.89	22.78
Well-watered	P2xP4	3	93	73.33	15.38	22.67	11	60	53.64	40
Well-watered	P2xP5	3	93	81	14	20	14	57	53.54	32
Well-watered	P2xP6	3	93	83	12.5	23	10	53	55.48	26.82
Well-watered	P2xP7	3	94	83	15.3	22.5	8	59	51.41	30.04
Well-watered	P2xP8	3	94	85	15	21	8.5	55	53.35	35
Well-watered	P3	3	94	78.5	12.75	21.4	15	56	47.24	30
Well-watered	P3xP4	3	91	91.8	12.83	21.5	18.5	56	52.48	30
Well-watered	P3xP5	3	97	83.8	13	21	17	55	48.5	40.26
Well-watered	P3xP6	3	96	85.5	12.1	20	15	53	55	32
Well-watered	P3xP7	3	96	84.8	13.6	21.6	13	57	49.47	29.5
Well-watered	P3xP8	3	95	97	14	23	18	68	53.35	42
Well-watered	P4	3	99	93.67	14	23.2	11.6	60.9	49.86	36.44
Well-watered	P4xP5	3	96	86.75	14.8	22.75	15.75	62	52.57	43.22
Well-watered	P4xP6	3	94	100	15.2	21.4	20	60	46.95	30
Well-watered	P4xP7	3	91	96.75	15.8	23.33	11.5	59	48.5	25.86
Well-watered	P4xP8	3	93	96.5	15.7	22.67	8.8	59	53.35	34
Well-watered	P5	3	94	90	13.25	20.4	14	54	49.28	24.57
Well-watered	P5xP6	3	94	98.2	12.7	23	12.33	58	51.31	25.38
Well-watered	P5xP7	3	91	97.8	14.5	22.2	14.5	58.28	48.11	33.04
Well-watered	P5xP8	3	96	79.6	14.3	21.25	16.5	55	47.53	25.89
Well-watered	P6	3	92	86	12.33	21.6	12.4	56	50.34	22.84
Well-watered	P6xP7	3	91	103.8	14.13	24.2	13	64	51.22	33
Well-watered	P6xP8	3	90	98.33	13.5	22	12	53	57.42	25
Well-watered	P7	3	92	99.6	14.17	23.67	12	64	52.38	28
Well-watered	P7xP8	3	94	100.8	15.75	20.8	14.6	55	53.16	32
Well-watered	P8	3	91	93.25	13.08	21.75	12	57	52.38	26
Water-deficit	P1	1	93	70.33	13.4	23.4	11	59	50	21
Water-deficit	P1xP2	1	90	69.75	13.4	21.8	11	55	46.4	24
Water-deficit	P1xP3	1	91	70	13.8	21.8	14	55	39.3	24.76
Water-deficit	P1xP4	1	91	78	13.4	22	10	55	46.4	23.09
Water-deficit	P1xP5	1	90	61	11.4	20	13	43	35.7	29
Water-deficit	P1xP6	1	91	65.8	13.2	20	9.8	50	39.3	14.6
Water-deficit	P1xP7	1	90	66	14.6	18	4.33	45	39.3	15
Water-deficit	P1xP8	1	90	63.5	14	22	9.5	55	35.7	13.02
Water-deficit	P2	1	85	64	14.2	22	8	55	39.3	13
Water-deficit	P2xP3	1	91	76	11.6	16	6.75	40	42.9	11
Water-deficit	P2xP4	1	87	58	14.4	19.4	7	49	39.3	17
Water-deficit	P2xP5	1	90	74	12	18	8	52	42	16
Water-deficit	P2xP6	1	91	63.67	12.8	18.6	8	47	42.9	20
Water-deficit	P2xP7	1	95	74	14.6	19	5	40	39.3	13
Water-deficit	P2xP8	1	91	73	13	18.4	3.33	46	46.4	19
Water-deficit	P3	1	92	68.25	12.4	19.8	12.2	48	35.7	26.51
Water-deficit	P3xP4	1	96	76	12.4	20.2	10	53	39.3	20.69
Water-deficit	P3xP5	1	95	83.5	13.2	18.6	8	48	42.3	28
Water-deficit	P3xP6	1	91	83.75	12	19.2	10.25	47	46.4	26
Water-deficit	P3xP7	1	93	81.8	14.5	20	9	56	46.4	17.61
Water-deficit	P3xP8	1	93	87.6	13.5	22	14	58	57.1	33.79
Water-deficit	P4	1	94	92	15.1	22	8.4	53	35.7	21.22
Water-deficit	P4xP5	1	94	84.4	14.5	23.4	11	57	50	33
Water-deficit	P4xP6	1	86	91	14.3	22.2	9.4	60	46.4	31.28
Water-deficit	P4xP7	1	87	92	14.7	21.4	8.2	55	54	27.27
Water-deficit	P4xP8	1	97	91.43	14.6	22	11	55	46.2	29.96
Water-deficit	P5	1	91	84	12.4	19.4	12	49	39.3	9.34
Water-deficit	P5xP6	1	91	86.2	13.8	20.6	6	48	46.4	19
Water-deficit	P5xP7	1	87	92.6	13.2	20.8	10.6	51	46.4	26
Water-deficit	P5xP8	1	93	83	13.6	20.4	10.8	48	46.4	30.77
Water-deficit	P6	1	94	88.5	12.2	19.2	11.8	48	42.9	18.93
Water-deficit	P6xP7	1	87	92.6	13	22	9.2	52	40	24.36
Water-deficit	P6xP8	1	87	90	13.4	21	10.4	53	42.9	24
Water-deficit	P7	1	91	83	13.6	21.4	7.8	53	39.3	12.77
Water-deficit	P7xP8	1	93	87.5	13.6	20.8	9	54	46.4	16.24
Water-deficit	P8	1	91	87.33	13.4	18.6	14	46	50	27.3
Water-deficit	P1	2	93	82	13.8	22.4	8.8	56	51.2	19
Water-deficit	P1xP2	2	91	77.4	12.9	20.2	9.6	50	51.1	26
Water-deficit	P1xP3	2	91	72.5	12	20.83	9.2	52	54	24.37
Water-deficit	P1xP4	2	95	79.33	13.17	20.67	9.5	52	47.9	21
Water-deficit	P1xP5	2	92	77.67	13.9	19.4	12.8	44	51	31.96
Water-deficit	P1xP6	2	87	72.4	13.4	18	10	56	41	18.25
Water-deficit	P1xP7	2	97	71	13.2	16	8	44	47.2	16.51
Water-deficit	P1xP8	2	93	66.2	14.9	21.4	16	54	50.4	20.83
Water-deficit	P2	2	86	61	13.67	24.33	8.67	52	40	15.76
Water-deficit	P2xP3	2	91	76	10.1	17.4	7.6	44	47.8	13.22
Water-deficit	P2xP4	2	88	66	14.9	20	6.67	50	43.7	19
Water-deficit	P2xP5	2	90	73	13	19	4	40	40	14
Water-deficit	P2xP6	2	92	78	13.9	20.2	8.4	51	46.1	22
Water-deficit	P2xP7	2	87	80	13.25	17	6.5	45	44.1	14.69
Water-deficit	P2xP8	2	91	76.5	14	20	10	50	44.4	17
Water-deficit	P3	2	95	75.25	10.8	21	13	53	42	18.83
Water-deficit	P3xP4	2	91	88	14	20.5	19	52	35	22
Water-deficit	P3xP5	2	94	83.25	13.75	19	14	48	50	32.83
Water-deficit	P3xP6	2	91	82	11	17.25	15.75	44	46.9	24
Water-deficit	P3xP7	2	91	85.75	13.5	21	9.33	50	42.6	22.8
Water-deficit	P3xP8	2	91	85.6	13.4	21	16.75	60	52	38.91
Water-deficit	P4	2	96	82.67	14.9	21	8	60	51.4	21.78
Water-deficit	P4xP5	2	92	85.33	14.17	21	11	60	52	31
Water-deficit	P4xP6	2	87	88.14	14.3	20.6	13.33	55	48	40.22
Water-deficit	P4xP7	2	86	94.75	15.1	23.2	8.2	52	50	23
Water-deficit	P4xP8	2	91	92	14.17	23	12.25	57	40.5	33.5
Water-deficit	P5	2	92	91	11.75	21	13.5	51	53	15.36
Water-deficit	P5xP6	2	91	95.2	13.33	22.33	9.4	50	48	21
Water-deficit	P5xP7	2	92	94	14.13	21.5	12.25	55	48	20
Water-deficit	P5xP8	2	92	80	12.5	21	12.75	54	47	26
Water-deficit	P6	2	91	85.4	10.4	20.6	9.8	52	47.9	18
Water-deficit	P6xP7	2	95	93.43	13.7	21.8	12.4	57	52	29.16
Water-deficit	P6xP8	2	90	92.33	11.4	20	8.2	49	40	26
Water-deficit	P7	2	92	88.71	14.5	22.5	8.6	55	49.9	12.8
Water-deficit	P7xP8	2	91	89	12	20.4	8.8	51	56.1	16
Water-deficit	P8	2	93	91.43	12.9	20.6	12	50	53	22
Water-deficit	P1	3	91	81	16.7	22.4	11.75	56	52	25
Water-deficit	P1xP2	3	91	80.2	14	20.2	10.6	51	50.6	21
Water-deficit	P1xP3	3	92	76	12	20.83	11.2	52	53.9	28.3
Water-deficit	P1xP4	3	92	80	15	20.67	13	52	49	26
Water-deficit	P1xP5	3	92	68.5	13	19.4	13	49	50.2	28
Water-deficit	P1xP6	3	92	79.8	13.4	21	9.8	56	41	18.93
Water-deficit	P1xP7	3	96	76	14	18	7	40	45	19
Water-deficit	P1xP8	3	96	78.25	14.2	21.4	8.2	54	49	20.15
Water-deficit	P2	3	84	75.8	15.33	24.33	9	55	45	14
Water-deficit	P2xP3	3	92	71	12.4	17.4	8.75	45	43	16
Water-deficit	P2xP4	3	87	73.4	14.4	20	6.2	50	44.1	21
Water-deficit	P2xP5	3	90	72	12.5	20	9.25	50	45	21
Water-deficit	P2xP6	3	91	73.5	14.5	20.2	11.4	51	41.4	20
Water-deficit	P2xP7	3	92	66	15.6	20	4.5	40	44.1	13
Water-deficit	P2xP8	3	91	76.5	15	20	6	50	42	20
Water-deficit	P3	3	92	76	13	21	12.8	54	44.8	27.93
Water-deficit	P3xP4	3	90	82	11	20.5	12	48	37.5	23
Water-deficit	P3xP5	3	92	86	14.8	19	13	46	40	31
Water-deficit	P3xP6	3	92	80.75	12.8	17.25	19	43	48	28
Water-deficit	P3xP7	3	92	78.5	13.8	21	13	50	45	16.69
Water-deficit	P3xP8	3	92	85.6	12.2	22	15	62	55	33
Water-deficit	P4	3	92	83	14	21	12.6	57	51.6	38.2
Water-deficit	P4xP5	3	93	79.5	14.63	21	12	63	51	35
Water-deficit	P4xP6	3	91	88.2	13.17	20.6	10.4	58	50	21.98
Water-deficit	P4xP7	3	87	79.6	14.5	22.4	13.33	50	54	29.12
Water-deficit	P4xP8	3	95	92	14.6	23	11.33	59	51.9	26.75
Water-deficit	P5	3	88	86	13	21	14.8	55	52	26.65
Water-deficit	P5xP6	3	92	96	14.3	22.33	11.33	53	48.1	26
Water-deficit	P5xP7	3	94	91.5	15.8	21.5	11.2	54	42	24
Water-deficit	P5xP8	3	93	81	13.7	21	11.6	55	48.7	32.3
Water-deficit	P6	3	88	86.4	11.7	20.6	16.4	52	48	31
Water-deficit	P6xP7	3	93	92.8	15.4	21.8	13	55	50.6	38.65
Water-deficit	P6xP8	3	90	83.6	10	20	8	50	43	22
Water-deficit	P7	3	92	87	14	22.5	11.2	57	51.3	17.22
Water-deficit	P7xP8	3	91	90	15.7	20.4	17	49	57.1	21.69
Water-deficit	P8	3	93	83.33	13.1	20.6	14.25	52	52	31
